# Supplementary material
Source: MDPI journal article supplement (https://www.mdpi.com/2227-9717/11/5/1489)
Supplement: s1 [file s1]

**Table S1.** The advantages and disadvantages of the main technologies for Cr(VI) removal.

|   |                        | Advantages                                                                           | Disadvantages                                                  |
|---|------------------------|--------------------------------------------------------------------------------------|----------------------------------------------------------------|
| 1 | membrane separation    | Higher removal efficiency, no pollution loads and sometimes lower energy consumption | Highly depend on materials, membrane pore size and composition |
| 2 | Ion exchange           | High efficiency, low cost, less sludge volume and high selectivity                   | Highly depend on resin structure and solution environment      |
| 3 | Chemical precipitation | Simple, effective                                                                    | Secondary pollution                                            |
| 4 | Electrocoagulation     | Simple, productive, ease of operation                                                | Poor systematic reactor design and sacrifice of electrodes     |
| 5 | Electrodialysis        | Low energy consumption                                                               | Highly cost of electrodes                                      |
| 6 | Adsorption             | High efficiency, simple operation and ease of regeneration                           | Depend on the solution environment                             |

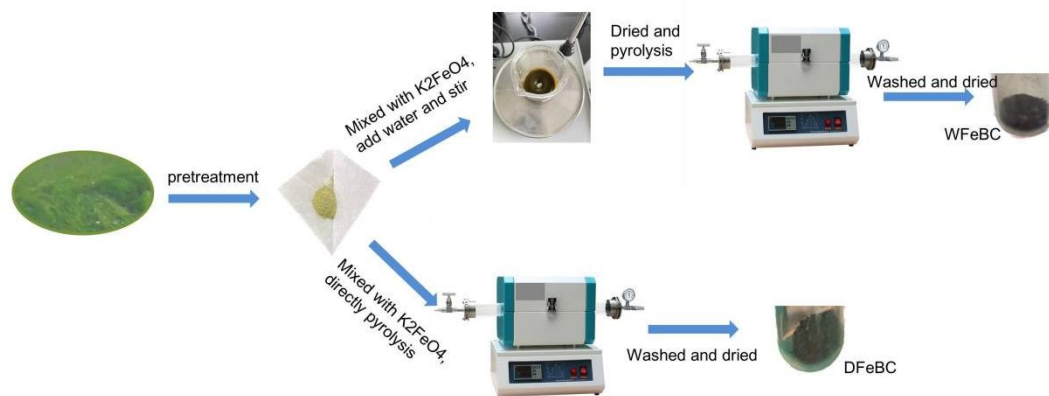

**Figure S1.** The preparation process of materials.
